# Supplementary material
Source: HighWire-hosted journal article supplement (https://jnm.snmjournals.org/highwire/filestream/95583/field_highwire_adjunct_files/0/238287_Supplemental_Data.pdf)
Supplement: 238287_Supplemental_Data.pdf [file 238287_Supplemental_Data.pdf]

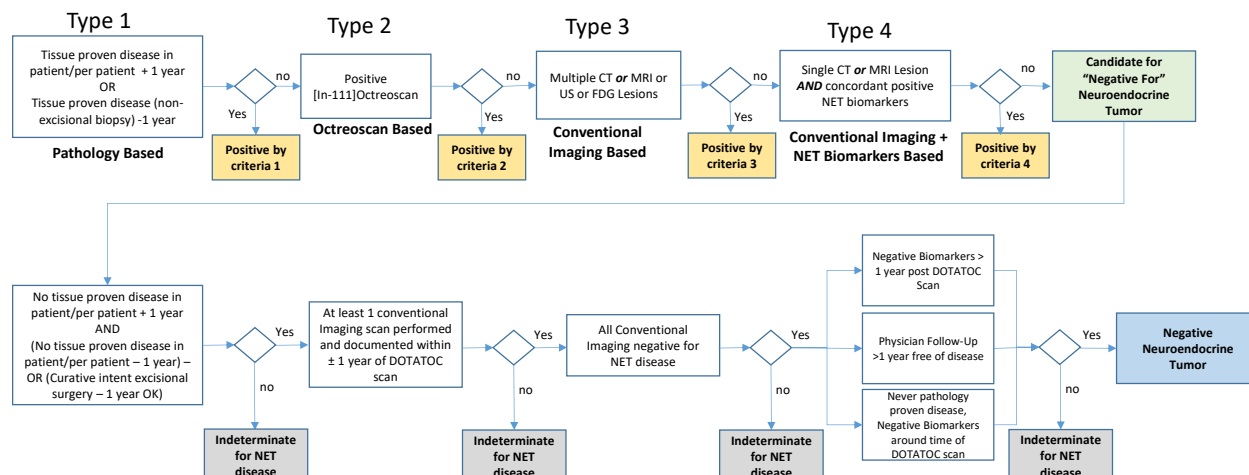

**SUPPLEMENTAL FIGURE 1.** Flow chart defining tissue positivity and negativity in the  $^{68}\text{Ga}$ -DOTATOC retrospective trial.

| Standardized Criteria                         | Reason                                                                                                               | Examples                                                                        |
|-----------------------------------------------|----------------------------------------------------------------------------------------------------------------------|---------------------------------------------------------------------------------|
| Radiopharmaceutical end-product specification | Assure same drug quality across trials                                                                               | pH range, radionuclidic purity, radiopharmaceutical purity                      |
| Adverse Event Data Collection                 | Assure safety standards consistently reported                                                                        | Same reporting lexicon, same follow-up periods...                               |
| Dose Range                                    | Assuring same dose                                                                                                   | 3-5 mCi, with target 4 mCi                                                      |
| Acquisition Parameters                        | Assuring same/similar imaging protocols                                                                              | Scan commenced 55-70 minutes post injection                                     |
| Interpretation criteria                       | Assure consistent interpretation across trials                                                                       | Dual blinded reads, Threshold $\text{SUV}_{\text{max}}$ , Minimum size criteria |
| Reference/Truth Standard                      | Assure true positive, true negative, false positive, and false negative results are reported based on same criteria. | Comparison with histopathology or if no pathology, then conventional imaging.   |
